# Supplementary material
Source: PubMed Central journal article supplement (PMC3049464)

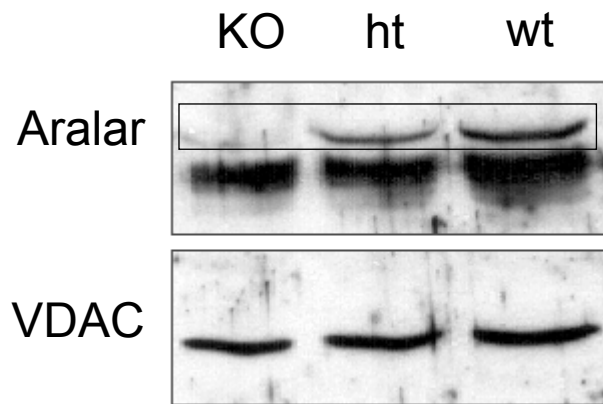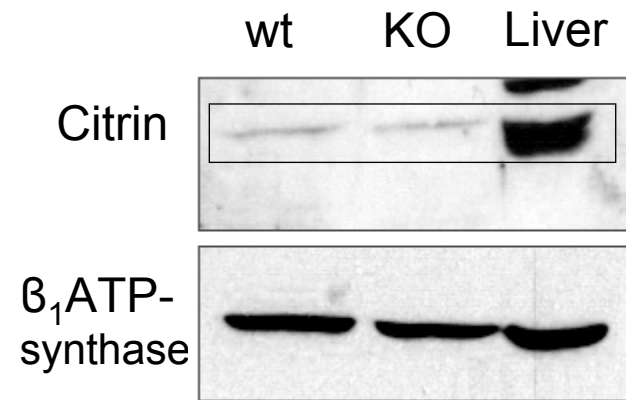

Supplementary  
Figure 1 (Pardo et al.)

Supplement: jcbfm2010146x1.pdf [file jcbfm2010146x1.pdf]

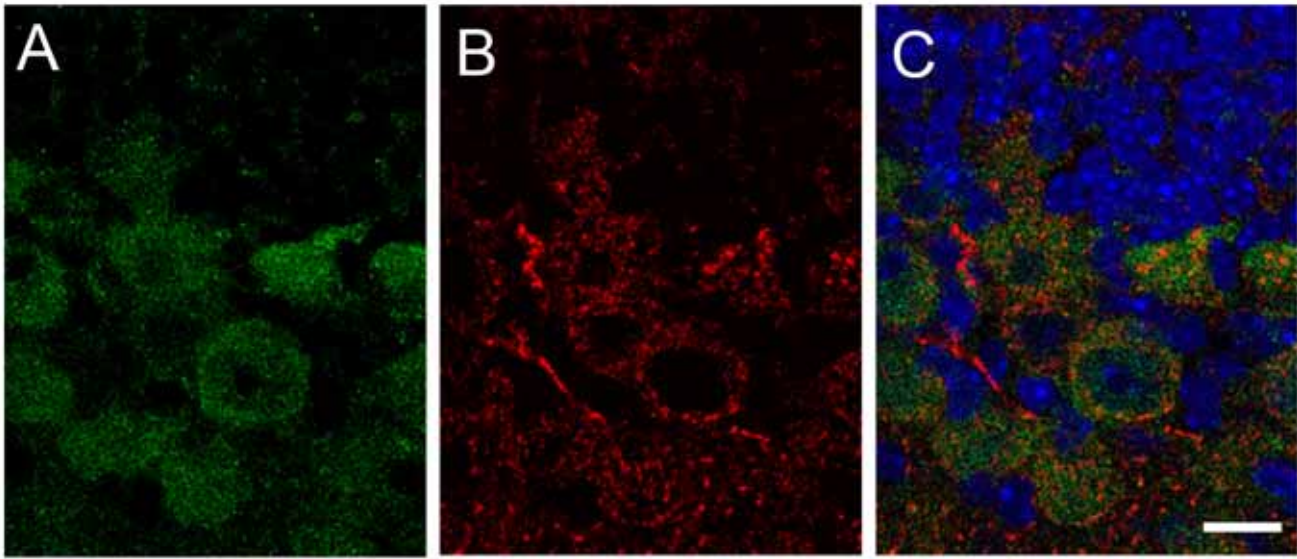

Supplementary Figure 2 (Pardo et al.)

Supplement: jcbfm2010146x2.pdf [file jcbfm2010146x2.pdf]

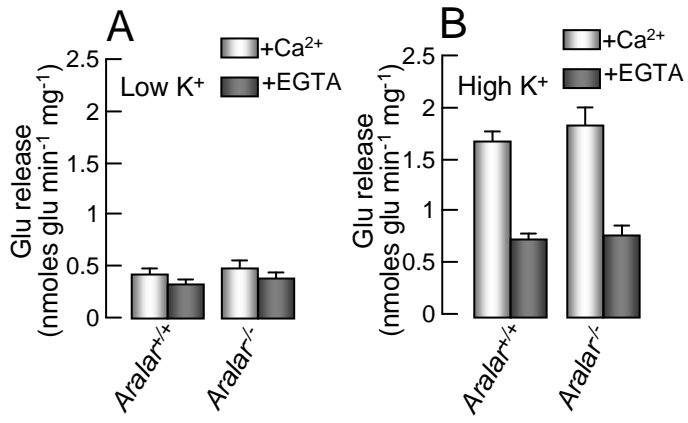

Supplementary Figure 3 (Pardo et al.)

Supplement: jcbfm2010146x3.pdf [file jcbfm2010146x3.pdf]

*Aralar*<sup>-/-</sup>

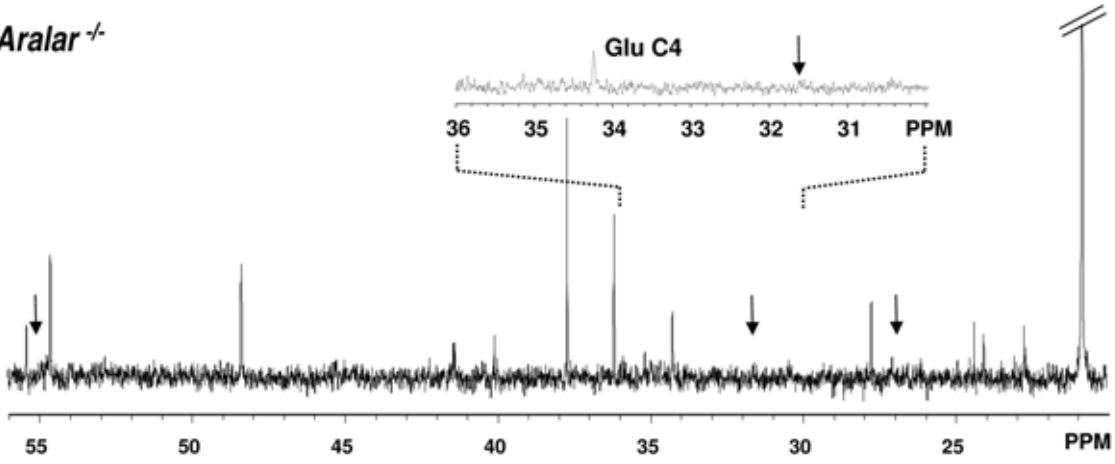

*Aralar*<sup>+/+</sup>

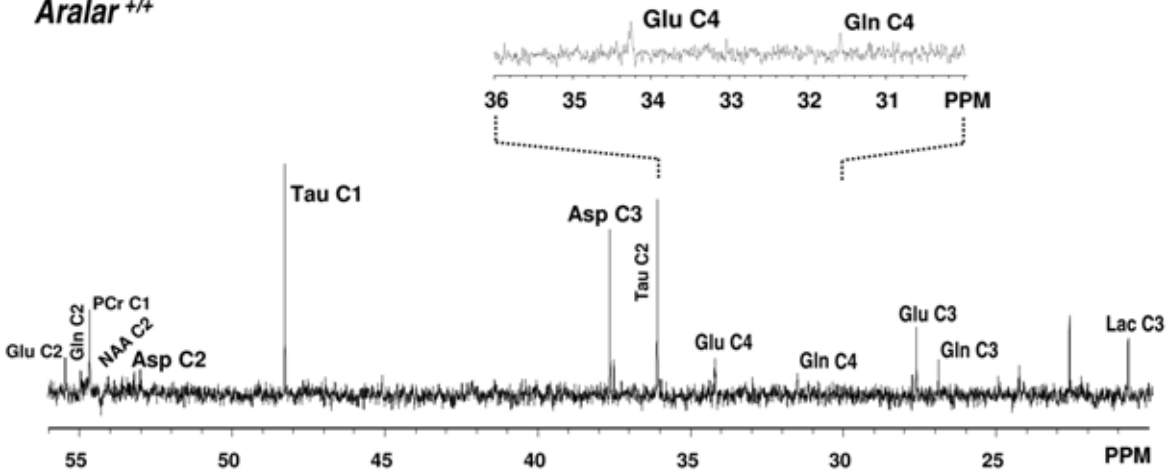

Supplementary Fig.4 (Pardo et al.)

Supplement: jcbfm2010146x4.pdf [file jcbfm2010146x4.pdf]
